# Supplementary material for: The first example of ab initio calculations of f–f transitions for the case of [Eu(DOTP)]5− complex—experiment versus theory
Source: Royal Society of Chemistry journal article supplement (doi:10.1039/c6cp05284c), 2016-01-01
Supplement: c6cp05284c1.pdf [file c6cp05284c1.pdf]

## Electronic Supplementary Information

**Table 1S.** The assignments of the selected vibrations in IR spectra of **I** and **II**

**Table 2S.** Theoretical energies (in  $\text{cm}^{-1}$ )  $^{2S+1}L_J$  states of **II<sub>Eu1</sub>** and **II<sub>Eu2</sub>** obtained within CASSCF/CASPT2/RASSI calculations.

**Table 3S.** Cartesian coordinates (in Å) of the DFT optimized geometry of  $\{\text{K}_4[\text{Eu}(\text{DOTP})]\}^-$  cluster representing **I<sub>Eu1</sub>** and **II<sub>Eu1</sub>** sites.

**Table 1S.** The assignments of the selected vibrations in IR spectra of I and II

| Exp (I) | Exp (II) | Calc | Vibr                                 |
|---------|----------|------|--------------------------------------|
| 140     | 136      | 180  | $\tau_{PO}, \nu_{EuN}$               |
|         |          | 181  | $\rho_{CH2}, \rho_{PO2}, \nu_{EuN}$  |
| 260     | 254      | 245  | $\rho_{CH2}, \rho_{PO2}, \nu_{EuO}$  |
|         |          | 245  | $\nu_{PO}, \delta_{CH2}, \nu_{EuO}$  |
| 468     | 476      | 482  | $\nu_{PO}$                           |
| 510     | 510      | 483  | $\nu_{PO}$                           |
| 584     | 584      | 581  | $\rho_{CH2}, \omega_{CH2}$           |
| 755     | 755      | 767  | $\delta_{PO}, \tau_{CH2}$            |
| 800     | 801      | 807  | $\delta_{CH2}$                       |
|         | 831      | 871  | $\omega_{CH2}$                       |
| 930     | 930      | 871  | $\omega_{CH2}$                       |
| 974     | 974      | 893  | $\delta_{CH2}$                       |
|         |          | 893  | $\delta_{CH2}$                       |
| 974     | 974      | 935  | $\delta_{PO\ sym}$                   |
| 1057    | 1059     | 1003 | $\nu_{CN}$                           |
|         |          | 1004 | $\delta_{CH2}$                       |
|         |          | 1044 | $\delta_{PO\ sym}$                   |
|         |          | 1044 | $\delta_{PO\ sym}$                   |
| 1057    | 1059     | 1068 | $\rho_{CH2}$                         |
|         |          | 1106 | $\omega_{CH2}$                       |
|         | 1106     | 1107 | $\tau_{CH2}$                         |
| 1070    | 1073     | 1178 | $\rho_{CH2}, \nu_{PO}, \delta_{CH2}$ |
| 1121    | 1124     | 1182 | $\nu_{PO}$                           |
|         |          | 1194 | $\rho_{CH2}, \nu_{PO}$               |
| 2820    | 2822     | 2968 | $\nu_{CH2}$                          |
| 2861    | 2860     | 2969 | $\nu_{CH2}$                          |
|         | 2926     | 2971 | $\nu_{CH2}$                          |
|         | 2963     | 2981 | $\nu_{CH2}$                          |
|         |          | 2982 | $\nu_{CH2}$                          |
|         |          | 2984 | $\nu_{CH2}$                          |
|         |          | 3102 | $\nu_{CH2}$                          |

**Table 2S.** Theoretical energies (in  $\text{cm}^{-1}$ )  $^{2S+1}L_J$  states of  $\Pi_{\text{Eu1}}$  and  $\Pi_{\text{Eu2}}$  obtained within CASSCF/CASPT2/RASSI calculations

| Isomer $\Pi_{\text{Eu1}}$ |          |       |                             |
|---------------------------|----------|-------|-----------------------------|
| Level                     | (2S+1) L | Irrep | Energy ( $\text{cm}^{-1}$ ) |
| 1                         | 7F       | 1 A   | 0.000                       |
| 2                         | 7F       | 2 A   | 192.406                     |
| 3                         | 7F       | 1 E   | 520.384                     |
| 4                         | 7F       | 2 E   | 1090.796                    |
| 5                         | 7F       | 1 B   | 1110.748                    |
| 6                         | 7F       | 3 A   | 1115.541                    |
| 7                         | 7F       | 2 B   | 1362.143                    |
| 8                         | 7F       | 3 E   | 2014.914                    |
| 9                         | 7F       | 4 A   | 2043.122                    |
| 10                        | 7F       | 3 B   | 2083.971                    |
| 11                        | 7F       | 4 E   | 2110.068                    |
| 12                        | 7F       | 4 B   | 2138.497                    |
| 13                        | 7F       | 5 A   | 2869.430                    |
| 14                        | 7F       | 6 A   | 3057.714                    |
| 15                        | 7F       | 5 E   | 3064.412                    |
| 16                        | 7F       | 6 E   | 3152.168                    |
| 17                        | 7F       | 5 B   | 3216.174                    |
| 18                        | 7F       | 7 A   | 3217.592                    |
| 19                        | 7F       | 6 B   | 3353.287                    |
| 20                        | 7F       | 7 E   | 3993.078                    |
| 21                        | 7F       | 8 E   | 4169.391                    |
| 22                        | 7F       | 7 B   | 4199.036                    |
| 23                        | 7F       | 8 A   | 4259.326                    |
| 24                        | 7F       | 9 A   | 4290.863                    |
| 25                        | 7F       | 8 B   | 4409.077                    |
| 26                        | 7F       | 9 E   | 4485.949                    |
| 27                        | 7F       | 10 A  | 4537.285                    |
| 28                        | 7F       | 9 B   | 5036.972                    |
| 29                        | 7F       | 10 B  | 5037.959                    |
| 30                        | 7F       | 10 E  | 5231.685                    |
| 31                        | 7F       | 11 A  | 5473.394                    |
| 32                        | 7F       | 12 A  | 5503.881                    |
| 33                        | 7F       | 11 E  | 5589.148                    |
| 34                        | 7F       | 11 B  | 5611.124                    |
| 35                        | 7F       | 13 A  | 5719.395                    |
| 36                        | 7F       | 12 E  | 5731.584                    |
| 37                        | 7F       | 12 B  | 5743.334                    |
| 38                        | 5D       | 14 A  | 18168.792                   |
| 39                        | 5D       | 15 A  | 18895.808                   |
| 40                        | 5D       | 13 E  | 18961.388                   |
| 41                        | 5D       | 16 A  | 20529.463                   |
| 42                        | 5D       | 13 B  | 20534.530                   |
| 43                        | 5D       | 14 E  | 20580.666                   |
| 44                        | 5D       | 14 B  | 20601.392                   |

|    |    |      |           |
|----|----|------|-----------|
| 45 | 5D | 15 B | 23160.141 |
| 46 | 5D | 15 E | 23163.084 |
| 47 | 5D | 16 B | 23200.116 |
| 48 | 5D | 16 E | 23209.626 |
| 49 | 5D | 17 A | 23214.018 |
| 50 | 5D | 18 A | 26902.691 |
| 51 | 5D | 19 A | 26911.917 |
| 52 | 5D | 17 E | 26916.590 |
| 53 | 5D | 17 B | 26950.595 |
| 54 | 5D | 18 B | 26965.080 |
| 55 | 5D | 18 E | 27011.179 |
| 56 | 5D | 20 A | 27042.720 |
| 57 | 5G | 19 B | 27668.957 |
| 58 | 5G | 19 E | 27691.804 |
| 59 | 5G | 20 B | 27693.678 |
| 60 | 5G | 21 A | 27766.221 |
| 61 | 5G | 20 E | 27793.620 |
| 62 | 5G | 22 A | 27804.876 |
| 63 | 5G | 23 A | 27902.079 |
| 64 | 5G | 21 B | 27906.818 |
| 65 | 5G | 21 E | 27911.386 |
| 66 | 5G | 22 B | 27922.196 |
| 67 | 5G | 24 A | 27933.622 |
| 68 | 5G | 22 E | 28012.422 |
| 69 | 5G | 23 B | 28054.442 |
| 70 | 5G | 23 E | 28097.311 |
| 71 | 5G | 24 B | 28109.609 |
| 72 | 5G | 25 A | 28137.261 |
| 73 | 5G | 24 E | 28190.555 |
| 74 | 5G | 26 A | 28223.319 |
| 75 | 5G | 25 E | 28286.642 |
| 76 | 5G | 27 A | 28299.585 |
| 77 | 5G | 28 A | 28309.744 |
| 78 | 5G | 25 B | 28334.924 |
| 79 | 5G | 26 E | 28342.999 |
| 80 | 5G | 26 B | 28380.176 |
| 81 | 5L | 27 B | 28583.521 |
| 82 | 5L | 27 E | 28598.337 |
| 83 | 5L | 29 A | 28610.114 |
| 84 | 5L | 28 B | 28677.727 |
| 85 | 5L | 29 B | 28682.359 |
| 86 | 5L | 28 E | 28777.398 |
| 87 | 5L | 30 B | 28801.715 |
| 88 | 5L | 30 A | 28827.209 |
| 89 | 5L | 29 E | 28847.120 |
| 90 | 5L | 31 A | 28910.831 |
| 91 | 5G | 31 B | 29093.840 |
| 92 | 5G | 32 B | 29111.030 |
| 93 | 5L | 32 A | 29116.767 |

|     |    |      |           |
|-----|----|------|-----------|
| 94  | 5L | 30 E | 29132.706 |
| 95  | 5L | 33 B | 29139.065 |
| 96  | 5G | 31 E | 29148.861 |
| 97  | 5G | 33 A | 29184.755 |
| 98  | 5G | 34 A | 29199.242 |
| 99  | 5G | 32 E | 29212.549 |
| 100 | 5L | 33 E | 29232.622 |
| 101 | 5G | 34 B | 29242.139 |
| 102 | 5L | 35 B | 29251.890 |
| 103 | 5L | 34 E | 29291.335 |
| 104 | 5L | 35 A | 29298.048 |
| 105 | 5L | 36 A | 29330.259 |
| 106 | 5L | 36 B | 29333.304 |
| 107 | 5L | 35 E | 29333.792 |
| 108 | 5L | 37 B | 29342.530 |
| 109 | 5L | 38 B | 29372.351 |
| 110 | 5L | 36 E | 29373.953 |
| 111 | 5L | 37 A | 29377.654 |
| 112 | 5L | 38 A | 29780.579 |
| 113 | 5L | 39 B | 29789.421 |
| 114 | 5L | 37 E | 29816.570 |
| 115 | 5L | 39 A | 29880.247 |
| 116 | 5L | 40 A | 29925.289 |
| 117 | 5L | 40 B | 29949.995 |
| 118 | 5L | 38 E | 29957.747 |
| 119 | 5L | 41 A | 29968.068 |
| 120 | 5L | 39 E | 30006.490 |
| 121 | 5L | 42 A | 30013.788 |
| 122 | 5L | 41 B | 30026.955 |
| 123 | 5L | 40 E | 30032.604 |
| 124 | 5L | 42 B | 30051.652 |
| 125 | 5L | 43 A | 30620.919 |
| 126 | 5L | 41 E | 30626.234 |
| 127 | 5L | 43 B | 30630.547 |
| 128 | 5L | 42 E | 30722.808 |
| 129 | 5L | 44 A | 30759.641 |
| 130 | 5L | 44 B | 30779.897 |
| 131 | 5L | 43 E | 30785.754 |
| 132 | 5L | 45 A | 30804.961 |
| 133 | 5L | 46 A | 30830.620 |
| 134 | 5L | 47 A | 30858.687 |
| 135 | 5L | 45 B | 30866.028 |
| 136 | 5L | 44 E | 30870.258 |
| 137 | 5L | 45 E | 30891.676 |
| 138 | 5L | 46 B | 30895.573 |
| 139 | 5L | 47 B | 31625.529 |
| 140 | 5L | 46 E | 31630.677 |
| 141 | 5L | 48 A | 31635.301 |
| 142 | 5L | 48 B | 31706.266 |

|     |    |      |           |
|-----|----|------|-----------|
| 143 | 5L | 49 B | 31713.806 |
| 144 | 5L | 47 E | 31763.243 |
| 145 | 5L | 49 A | 31770.679 |
| 146 | 5L | 50 B | 31786.185 |
| 147 | 5L | 48 E | 31806.315 |
| 148 | 5L | 50 A | 31880.691 |
| 149 | 5L | 51 B | 31913.678 |
| 150 | 5L | 51 A | 31916.514 |
| 151 | 5L | 49 E | 31919.011 |
| 152 | 5L | 52 A | 31965.488 |
| 153 | 5L | 52 B | 31967.300 |
| 154 | 5L | 50 E | 31971.535 |
| 155 | 5H | 53 B | 33331.418 |
| 156 | 5H | 51 E | 33352.926 |
| 157 | 5H | 54 B | 33382.912 |
| 158 | 5H | 52 E | 33469.107 |
| 159 | 5H | 53 A | 33537.295 |
| 160 | 5H | 53 E | 33604.450 |
| 161 | 5H | 54 A | 33625.088 |
| 162 | 5H | 55 B | 33636.413 |
| 163 | 5H | 55 A | 33659.263 |
| 164 | 5H | 56 B | 33690.515 |
| 165 | 5H | 54 E | 33708.082 |
| 166 | 5H | 56 A | 33726.314 |
| 167 | 5H | 57 A | 33789.181 |
| 168 | 5H | 55 E | 33798.533 |
| 169 | 5H | 58 A | 33815.659 |
| 170 | 5H | 57 B | 33819.377 |
| 171 | 5H | 59 A | 33852.468 |
| 172 | 5H | 56 E | 33860.265 |
| 173 | 5H | 57 E | 33869.978 |
| 174 | 5H | 58 B | 33874.157 |
| 175 | 5H | 60 A | 33896.456 |
| 176 | 5H | 59 B | 33901.269 |
| 177 | 5H | 58 E | 33906.917 |
| 178 | 5H | 60 B | 33942.178 |
| 179 | 5H | 61 B | 33963.259 |
| 180 | 5H | 61 A | 33984.662 |
| 181 | 5H | 59 E | 33990.484 |
| 182 | 5H | 60 E | 34044.197 |
| 183 | 5H | 62 A | 34068.133 |
| 184 | 5H | 62 B | 34082.849 |
| 185 | 5H | 61 E | 34094.602 |
| 186 | 5H | 63 A | 34103.670 |
| 187 | 5H | 63 B | 34117.540 |
| 188 | 5H | 62 E | 34129.103 |
| 189 | 5H | 64 B | 34143.805 |
| 190 | 5H | 63 E | 34161.001 |
| 191 | 5H | 64 A | 34173.687 |

|     |    |      |           |
|-----|----|------|-----------|
| 192 | 5H | 65 B | 34243.682 |
| 193 | 5H | 64 E | 34252.705 |
| 194 | 5H | 65 A | 34271.516 |
| 195 | 5H | 66 B | 34273.730 |
| 196 | 5F | 65 E | 36354.043 |
| 197 | 5F | 66 A | 36509.133 |
| 198 | 5F | 67 B | 36764.532 |
| 199 | 5F | 66 E | 36831.682 |
| 200 | 5F | 68 B | 36835.445 |
| 201 | 5F | 67 A | 36850.231 |
| 202 | 5F | 69 B | 37286.780 |
| 203 | 5F | 67 E | 37295.103 |
| 204 | 5F | 68 A | 37308.969 |
| 205 | 5F | 68 E | 37372.374 |
| 206 | 5F | 70 B | 37389.383 |
| 207 | 5F | 69 A | 37721.024 |
| 208 | 5F | 70 A | 37722.564 |
| 209 | 5F | 71 B | 37812.785 |
| 210 | 5I | 71 A | 37821.079 |
| 211 | 5F | 69 E | 37839.382 |
| 212 | 5F | 72 B | 37848.017 |
| 213 | 5F | 70 E | 37857.471 |
| 214 | 5F | 71 E | 37884.982 |
| 215 | 5I | 72 A | 37901.877 |
| 216 | 5I | 73 B | 37907.239 |
| 217 | 5F | 73 A | 37919.693 |
| 218 | 5I | 72 E | 37919.894 |
| 219 | 5I | 74 B | 37927.639 |
| 220 | 5I | 73 E | 37953.372 |
| 221 | 5I | 74 A | 38009.667 |
| 222 | 5F | 75 A | 38059.323 |
| 223 | 5F | 76 A | 38080.358 |
| 224 | 5F | 75 B | 38113.994 |
| 225 | 5F | 74 E | 38134.625 |
| 226 | 5F | 77 A | 38138.841 |
| 227 | 5F | 75 E | 38161.227 |
| 228 | 5F | 76 B | 38165.832 |
| 229 | 5I | 77 B | 38235.349 |
| 230 | 5I | 78 A | 38255.900 |
| 231 | 5I | 76 E | 38273.394 |
| 232 | 5I | 79 A | 38283.986 |
| 233 | 5I | 78 B | 38299.979 |
| 234 | 5I | 77 E | 38330.718 |
| 235 | 5I | 80 A | 38383.341 |
| 236 | 5I | 78 E | 38401.270 |
| 237 | 5I | 79 B | 38516.049 |
| 238 | 5I | 79 E | 38518.435 |
| 239 | 5I | 80 B | 38523.124 |
| 240 | 5I | 81 A | 38538.549 |

|     |    |      |           |
|-----|----|------|-----------|
| 241 | 5I | 81 B | 38552.873 |
| 242 | 5I | 82 A | 38572.930 |
| 243 | 5I | 80 E | 38573.282 |
| 244 | 5I | 81 E | 38602.345 |
| 245 | 5I | 82 B | 38629.560 |
| 246 | 5I | 83 A | 38652.079 |
| 247 | 5I | 82 E | 38654.942 |
| 248 | 5I | 83 B | 38655.365 |
| 249 | 5I | 84 A | 38665.479 |
| 250 | 5I | 85 A | 38683.347 |
| 251 | 5I | 86 A | 38695.057 |
| 252 | 5I | 83 E | 38700.129 |
| 253 | 5I | 84 E | 38728.651 |
| 254 | 5I | 84 B | 38732.955 |
| 255 | 5I | 85 B | 38751.466 |
| 256 | 5I | 85 E | 38780.022 |
| 257 | 5I | 86 B | 38782.950 |
| 258 | 5I | 87 B | 38802.945 |
| 259 | 5I | 87 A | 38814.544 |
| 260 | 5I | 88 A | 38844.207 |
| 261 | 5I | 86 E | 38868.988 |
| 262 | 5I | 89 A | 38892.519 |
| 263 | 5I | 87 E | 38900.567 |
| 264 | 5I | 90 A | 38902.896 |
| 265 | 5I | 88 B | 38914.254 |
| 266 | 5I | 89 B | 38917.220 |
| 267 | 5I | 88 E | 38939.620 |
| 268 | 5I | 90 B | 38946.221 |
| 269 | 5I | 91 A | 38960.971 |
| 270 | 5I | 89 E | 38987.293 |
| 271 | 5K | 90 E | 41883.349 |
| 272 | 5K | 92 A | 41946.778 |
| 273 | 5K | 93 A | 41954.269 |
| 274 | 5K | 91 B | 41954.759 |
| 275 | 5K | 91 E | 41978.054 |
| 276 | 5K | 94 A | 42050.199 |
| 277 | 5K | 92 E | 42112.137 |
| 278 | 5K | 92 B | 42131.354 |
| 279 | 5K | 93 B | 42791.053 |
| 280 | 5K | 94 B | 42811.770 |
| 281 | 5K | 93 E | 42877.705 |
| 282 | 5K | 95 A | 42936.705 |
| 283 | 5K | 95 B | 42948.996 |
| 284 | 5K | 96 A | 42962.395 |
| 285 | 5K | 94 E | 42970.204 |
| 286 | 5K | 95 E | 42995.818 |
| 287 | 5K | 96 B | 42999.237 |
| 288 | 5K | 97 A | 43001.327 |
| 289 | 5K | 96 E | 43665.677 |



|     |    |       |           |
|-----|----|-------|-----------|
| 290 | 5K | 97 B  | 43725.127 |
| 291 | 5K | 98 B  | 43735.416 |
| 292 | 5K | 97 E  | 43797.128 |
| 293 | 5K | 98 A  | 43808.531 |
| 294 | 5K | 99 B  | 43809.025 |
| 295 | 5K | 99 A  | 43841.676 |
| 296 | 5K | 98 E  | 43843.997 |
| 297 | 5K | 100 A | 43849.207 |
| 298 | 5K | 100 B | 43857.448 |
| 299 | 5K | 99 E  | 43871.565 |
| 300 | 5K | 101 A | 44461.861 |
| 301 | 5K | 102 A | 44462.990 |
| 302 | 5K | 100 E | 44498.613 |
| 303 | 5K | 101 B | 44519.538 |
| 304 | 5K | 102 B | 44540.710 |
| 305 | 5K | 101 E | 44560.087 |
| 306 | 5K | 103 B | 44575.976 |
| 307 | 5K | 103 A | 44583.123 |
| 308 | 5K | 102 E | 44607.264 |
| 309 | 5K | 104 A | 44617.023 |
| 310 | 5K | 105 A | 44673.285 |
| 311 | 5K | 104 B | 44673.589 |
| 312 | 5K | 103 E | 44676.948 |
| 313 | 5K | 106 A | 45133.636 |
| 314 | 5K | 104 E | 45136.745 |
| 315 | 5K | 105 B | 45150.144 |
| 316 | 5K | 105 E | 45153.271 |
| 317 | 5K | 107 A | 45159.887 |
| 318 | 5K | 106 B | 45170.702 |
| 319 | 5K | 108 A | 45199.678 |
| 320 | 5K | 106 E | 45209.279 |
| 321 | 5K | 107 B | 45256.203 |
| 322 | 5K | 107 E | 45289.903 |
| 323 | 5K | 109 A | 45317.795 |
| 324 | 5K | 110 A | 45446.393 |
| 325 | 5K | 108 E | 45463.635 |
| 326 | 5K | 108 B | 45476.958 |

Isomer II<sub>Eu2</sub>

| Level | (2S+1) L | Irrep | Energy (cm <sup>-1</sup> ) |
|-------|----------|-------|----------------------------|
| 1     | 7F       | 1 A   | 0                          |
| 2     | 7F       | 2 A   | 206.401                    |
| 3     | 7F       | 1 E   | 507.453                    |
| 4     | 7F       | 2 E   | 1078.547                   |
| 5     | 7F       | 3 A   | 1107.401                   |
| 6     | 7F       | 1 B   | 1110.631                   |
| 7     | 7F       | 2 B   | 1332.736                   |
| 8     | 7F       | 3 E   | 2005.537                   |
| 9     | 7F       | 4 A   | 2033.496                   |

|    |    |      |           |
|----|----|------|-----------|
| 10 | 7F | 3 B  | 2069.38   |
| 11 | 7F | 4 E  | 2093.288  |
| 12 | 7F | 4 B  | 2127.633  |
| 13 | 7F | 5 A  | 2863.882  |
| 14 | 7F | 6 A  | 3047.889  |
| 15 | 7F | 5 E  | 3049.801  |
| 16 | 7F | 6 E  | 3134.294  |
| 17 | 7F | 7 A  | 3196.324  |
| 18 | 7F | 5 B  | 3199.846  |
| 19 | 7F | 6 B  | 3338.002  |
| 20 | 7F | 7 E  | 3994.823  |
| 21 | 7F | 8 E  | 4158.038  |
| 22 | 7F | 7 B  | 4179.629  |
| 23 | 7F | 8 A  | 4257.099  |
| 24 | 7F | 9 A  | 4282.282  |
| 25 | 7F | 8 B  | 4371.328  |
| 26 | 7F | 9 E  | 4453.681  |
| 27 | 7F | 10 A | 4503.056  |
| 28 | 7F | 9 B  | 5065.764  |
| 29 | 7F | 10 B | 5066.632  |
| 30 | 7F | 10 E | 5218.276  |
| 31 | 7F | 11 A | 5446.771  |
| 32 | 7F | 12 A | 5471.712  |
| 33 | 7F | 11 E | 5559.678  |
| 34 | 7F | 11 B | 5582.748  |
| 35 | 7F | 13 A | 5680.937  |
| 36 | 7F | 12 E | 5691.209  |
| 37 | 7F | 12 B | 5701.577  |
| 38 | 5D | 14 A | 18156.489 |
| 39 | 5D | 15 A | 18884.968 |
| 40 | 5D | 13 E | 18948.412 |
| 41 | 5D | 16 A | 20512.5   |
| 42 | 5D | 13 B | 20524.847 |
| 43 | 5D | 14 E | 20570.688 |
| 44 | 5D | 14 B | 20586.729 |
| 45 | 5D | 15 B | 23143.769 |
| 46 | 5D | 15 E | 23156.609 |
| 47 | 5D | 16 B | 23180.856 |
| 48 | 5D | 16 E | 23196.685 |
| 49 | 5D | 17 A | 23204.566 |
| 50 | 5D | 18 A | 26893.823 |
| 51 | 5D | 19 A | 26903.946 |
| 52 | 5D | 17 E | 26909.016 |
| 53 | 5D | 17 B | 26938.543 |
| 54 | 5D | 18 B | 26952.72  |
| 55 | 5D | 18 E | 26994.984 |
| 56 | 5D | 20 A | 27025.681 |
| 57 | 5G | 19 B | 27672.923 |
| 58 | 5G | 19 E | 27699.417 |

|     |    |      |           |
|-----|----|------|-----------|
| 59  | 5G | 20 B | 27703.989 |
| 60  | 5G | 21 A | 27751.889 |
| 61  | 5G | 20 E | 27767.169 |
| 62  | 5G | 22 A | 27789.341 |
| 63  | 5G | 23 A | 27866.504 |
| 64  | 5G | 21 E | 27868.804 |
| 65  | 5G | 21 B | 27882.286 |
| 66  | 5G | 24 A | 27889.173 |
| 67  | 5G | 22 B | 27898.058 |
| 68  | 5G | 22 E | 27978.584 |
| 69  | 5G | 23 B | 28011.347 |
| 70  | 5G | 24 B | 28066.568 |
| 71  | 5G | 23 E | 28069.959 |
| 72  | 5G | 25 A | 28096.788 |
| 73  | 5G | 24 E | 28167.685 |
| 74  | 5G | 26 A | 28191.518 |
| 75  | 5G | 25 E | 28256.903 |
| 76  | 5G | 27 A | 28266.503 |
| 77  | 5G | 28 A | 28280.342 |
| 78  | 5G | 25 B | 28294.786 |
| 79  | 5G | 26 E | 28308.698 |
| 80  | 5G | 26 B | 28339.782 |
| 81  | 5L | 27 B | 28537.168 |
| 82  | 5L | 27 E | 28555.113 |
| 83  | 5L | 29 A | 28564.81  |
| 84  | 5L | 28 B | 28608.157 |
| 85  | 5L | 29 B | 28617.956 |
| 86  | 5L | 28 E | 28746.942 |
| 87  | 5L | 30 B | 28760.742 |
| 88  | 5L | 30 A | 28805.887 |
| 89  | 5L | 29 E | 28807.742 |
| 90  | 5L | 31 A | 28875.883 |
| 91  | 5L | 31 B | 29065.454 |
| 92  | 5L | 32 A | 29077.893 |
| 93  | 5L | 30 E | 29091.265 |
| 94  | 5G | 32 B | 29104.064 |
| 95  | 5G | 33 B | 29113.966 |
| 96  | 5G | 31 E | 29127.913 |
| 97  | 5G | 33 A | 29148.051 |
| 98  | 5L | 32 E | 29155.569 |
| 99  | 5G | 34 A | 29160.959 |
| 100 | 5G | 33 E | 29184.756 |
| 101 | 5G | 34 B | 29208.438 |
| 102 | 5L | 35 B | 29217.758 |
| 103 | 5L | 34 E | 29253.863 |
| 104 | 5G | 35 A | 29278.457 |
| 105 | 5L | 36 B | 29294.798 |
| 106 | 5L | 36 A | 29296.98  |
| 107 | 5L | 35 E | 29299.19  |

|     |    |      |           |
|-----|----|------|-----------|
| 108 | 5L | 37 B | 29302.983 |
| 109 | 5L | 38 B | 29332.129 |
| 110 | 5L | 37 A | 29333.309 |
| 111 | 5L | 36 E | 29344.521 |
| 112 | 5L | 37 E | 29752.035 |
| 113 | 5L | 39 B | 29758.488 |
| 114 | 5L | 38 A | 29762.865 |
| 115 | 5L | 39 A | 29798.305 |
| 116 | 5L | 40 A | 29867.977 |
| 117 | 5L | 40 B | 29913.169 |
| 118 | 5L | 38 E | 29915.728 |
| 119 | 5L | 41 A | 29941.108 |
| 120 | 5L | 39 E | 29966.029 |
| 121 | 5L | 42 A | 29980.159 |
| 122 | 5L | 40 E | 29990.866 |
| 123 | 5L | 41 B | 29996     |
| 124 | 5L | 42 B | 30023.47  |
| 125 | 5L | 43 A | 30577.319 |
| 126 | 5L | 41 E | 30580.156 |
| 127 | 5L | 43 B | 30584.075 |
| 128 | 5L | 42 E | 30651.749 |
| 129 | 5L | 44 A | 30735.898 |
| 130 | 5L | 44 B | 30740.548 |
| 131 | 5L | 43 E | 30743.533 |
| 132 | 5L | 45 A | 30764.466 |
| 133 | 5L | 46 A | 30793.601 |
| 134 | 5L | 47 A | 30816.043 |
| 135 | 5L | 45 B | 30834.905 |
| 136 | 5L | 44 E | 30834.782 |
| 137 | 5L | 45 E | 30854.758 |
| 138 | 5L | 46 B | 30863.645 |
| 139 | 5L | 47 B | 31576.715 |
| 140 | 5L | 46 E | 31579.757 |
| 141 | 5L | 48 A | 31582.191 |
| 142 | 5L | 48 B | 31635.039 |
| 143 | 5L | 49 B | 31638.755 |
| 144 | 5L | 47 E | 31726.426 |
| 145 | 5L | 49 A | 31735.815 |
| 146 | 5L | 50 B | 31753.147 |
| 147 | 5L | 48 E | 31766.615 |
| 148 | 5L | 50 A | 31849.623 |
| 149 | 5L | 49 E | 31886.902 |
| 150 | 5L | 51 A | 31887.587 |
| 151 | 5L | 51 B | 31888.058 |
| 152 | 5L | 52 A | 31922.681 |
| 153 | 5L | 52 B | 31926.094 |
| 154 | 5L | 50 E | 31934.62  |
| 155 | 5H | 53 B | 33302.983 |
| 156 | 5H | 54 B | 33348.489 |

|     |    |      |           |
|-----|----|------|-----------|
| 157 | 5H | 51 E | 33353.618 |
| 158 | 5H | 52 E | 33454.495 |
| 159 | 5H | 53 A | 33520.511 |
| 160 | 5H | 53 E | 33579.735 |
| 161 | 5H | 55 B | 33608.346 |
| 162 | 5H | 54 A | 33610.991 |
| 163 | 5H | 55 A | 33647.299 |
| 164 | 5H | 56 B | 33659.281 |
| 165 | 5H | 54 E | 33688.565 |
| 166 | 5H | 56 A | 33717.77  |
| 167 | 5H | 57 A | 33775.163 |
| 168 | 5H | 55 E | 33781.198 |
| 169 | 5H | 58 A | 33786.25  |
| 170 | 5H | 57 B | 33797.832 |
| 171 | 5H | 59 A | 33820.871 |
| 172 | 5H | 56 E | 33827.629 |
| 173 | 5H | 58 B | 33842.447 |
| 174 | 5H | 57 E | 33846.319 |
| 175 | 5H | 60 A | 33867.234 |
| 176 | 5H | 59 B | 33869.825 |
| 177 | 5H | 58 E | 33887.273 |
| 178 | 5H | 60 B | 33917.619 |
| 179 | 5H | 61 B | 33940.866 |
| 180 | 5H | 61 A | 33964.011 |
| 181 | 5H | 59 E | 33984.517 |
| 182 | 5H | 60 E | 34025.759 |
| 183 | 5H | 62 A | 34033.91  |
| 184 | 5H | 62 B | 34068.871 |
| 185 | 5H | 61 E | 34072.056 |
| 186 | 5H | 63 A | 34079.739 |
| 187 | 5H | 63 B | 34095.396 |
| 188 | 5H | 62 E | 34103.121 |
| 189 | 5H | 64 A | 34126.313 |
| 190 | 5H | 64 B | 34128.576 |
| 191 | 5H | 63 E | 34151.824 |
| 192 | 5H | 65 B | 34219.677 |
| 193 | 5H | 64 E | 34229.06  |
| 194 | 5H | 65 A | 34240.41  |
| 195 | 5H | 66 B | 34243.554 |
| 196 | 5F | 65 E | 36340.842 |
| 197 | 5F | 66 A | 36478.749 |
| 198 | 5F | 67 B | 36749.547 |
| 199 | 5F | 66 E | 36804.299 |
| 200 | 5F | 68 B | 36813.104 |
| 201 | 5F | 67 A | 36828.58  |
| 202 | 5F | 69 B | 37264.243 |
| 203 | 5F | 67 E | 37276.013 |
| 204 | 5F | 68 A | 37286.705 |
| 205 | 5F | 68 E | 37351.863 |

|     |    |      |           |
|-----|----|------|-----------|
| 206 | 5F | 70 B | 37361.297 |
| 207 | 5F | 69 A | 37714.683 |
| 208 | 5F | 70 A | 37716.093 |
| 209 | 5F | 71 B | 37784.958 |
| 210 | 5I | 71 A | 37804.346 |
| 211 | 5F | 69 E | 37828.796 |
| 212 | 5F | 72 B | 37829.379 |
| 213 | 5F | 70 E | 37842.726 |
| 214 | 5F | 71 E | 37866.873 |
| 215 | 5I | 72 A | 37880.962 |
| 216 | 5I | 73 B | 37893.715 |
| 217 | 5I | 74 B | 37899.653 |
| 218 | 5F | 73 A | 37902.524 |
| 219 | 5I | 72 E | 37903.197 |
| 220 | 5I | 73 E | 37942.33  |
| 221 | 5F | 74 A | 37989.458 |
| 222 | 5F | 75 A | 38028.547 |
| 223 | 5F | 76 A | 38050.757 |
| 224 | 5F | 75 B | 38086.42  |
| 225 | 5F | 77 A | 38101.922 |
| 226 | 5F | 74 E | 38105.354 |
| 227 | 5F | 75 E | 38126.673 |
| 228 | 5F | 76 B | 38132.838 |
| 229 | 5I | 77 B | 38223.236 |
| 230 | 5I | 78 A | 38233.048 |
| 231 | 5I | 79 A | 38257.555 |
| 232 | 5I | 76 E | 38265.234 |
| 233 | 5I | 78 B | 38278.996 |
| 234 | 5I | 77 E | 38307.314 |
| 235 | 5I | 80 A | 38369.495 |
| 236 | 5I | 78 E | 38379.178 |
| 237 | 5I | 79 B | 38497.892 |
| 238 | 5I | 80 B | 38501.742 |
| 239 | 5I | 79 E | 38511.643 |
| 240 | 5I | 81 A | 38541.093 |
| 241 | 5I | 81 B | 38556.296 |
| 242 | 5I | 82 A | 38561.756 |
| 243 | 5I | 80 E | 38568.779 |
| 244 | 5I | 81 E | 38588.618 |
| 245 | 5I | 82 B | 38623.687 |
| 246 | 5I | 83 A | 38625.222 |
| 247 | 5I | 83 B | 38633.181 |
| 248 | 5I | 82 E | 38638.503 |
| 249 | 5I | 84 A | 38648.78  |
| 250 | 5I | 85 A | 38659.453 |
| 251 | 5I | 86 A | 38667.831 |
| 252 | 5I | 83 E | 38678.509 |
| 253 | 5I | 84 B | 38702.15  |
| 254 | 5I | 84 E | 38715.305 |

|     |    |       |           |
|-----|----|-------|-----------|
| 255 | 5I | 85 B  | 38727.033 |
| 256 | 5I | 85 E  | 38757.239 |
| 257 | 5I | 86 B  | 38760.284 |
| 258 | 5I | 87 B  | 38786.11  |
| 259 | 5I | 87 A  | 38787.392 |
| 260 | 5I | 88 A  | 38807.088 |
| 261 | 5I | 86 E  | 38844.018 |
| 262 | 5I | 89 A  | 38847.854 |
| 263 | 5I | 90 A  | 38856.387 |
| 264 | 5I | 87 E  | 38871.669 |
| 265 | 5I | 88 B  | 38880.329 |
| 266 | 5I | 89 B  | 38888.147 |
| 267 | 5I | 90 B  | 38905.313 |
| 268 | 5I | 88 E  | 38914.747 |
| 269 | 5I | 91 A  | 38939.765 |
| 270 | 5I | 89 E  | 38955.452 |
| 271 | 5K | 90 E  | 41855.8   |
| 272 | 5K | 92 A  | 41909.201 |
| 273 | 5K | 93 A  | 41918.806 |
| 274 | 5K | 91 B  | 41928.842 |
| 275 | 5K | 91 E  | 41952.472 |
| 276 | 5K | 94 A  | 42026.046 |
| 277 | 5K | 92 E  | 42078.413 |
| 278 | 5K | 92 B  | 42096.725 |
| 279 | 5K | 93 B  | 42765.794 |
| 280 | 5K | 94 B  | 42783.281 |
| 281 | 5K | 93 E  | 42849.738 |
| 282 | 5K | 95 A  | 42907.479 |
| 283 | 5K | 95 B  | 42923.556 |
| 284 | 5K | 96 A  | 42929.46  |
| 285 | 5K | 94 E  | 42939.303 |
| 286 | 5K | 96 B  | 42964.725 |
| 287 | 5K | 95 E  | 42964.943 |
| 288 | 5K | 97 A  | 42967.204 |
| 289 | 5K | 96 E  | 43639.362 |
| 290 | 5K | 97 B  | 43696.392 |
| 291 | 5K | 98 B  | 43709.097 |
| 292 | 5K | 97 E  | 43765.099 |
| 293 | 5K | 98 A  | 43779.869 |
| 294 | 5K | 99 B  | 43785.772 |
| 295 | 5K | 99 A  | 43805.409 |
| 296 | 5K | 98 E  | 43812.454 |
| 297 | 5K | 100 A | 43818.196 |
| 298 | 5K | 100 B | 43821.299 |
| 299 | 5K | 99 E  | 43842.038 |
| 300 | 5K | 101 A | 44436.012 |
| 301 | 5K | 102 A | 44437.777 |
| 302 | 5K | 100 E | 44467.62  |
| 303 | 5K | 101 B | 44487.245 |

|     |    |       |           |
|-----|----|-------|-----------|
| 304 | 5K | 102 B | 44507.838 |
| 305 | 5K | 101 E | 44532.925 |
| 306 | 5K | 103 B | 44548.781 |
| 307 | 5K | 103 A | 44552.746 |
| 308 | 5K | 104 A | 44577.995 |
| 309 | 5K | 102 E | 44579.945 |
| 310 | 5K | 105 A | 44639.804 |
| 311 | 5K | 104 B | 44642.884 |
| 312 | 5K | 103 E | 44643.457 |
| 313 | 5K | 104 E | 45103.079 |
| 314 | 5K | 106 A | 45105.581 |
| 315 | 5K | 105 B | 45115.205 |
| 316 | 5K | 107 A | 45124.263 |
| 317 | 5K | 105 E | 45127.51  |
| 318 | 5K | 106 B | 45133.189 |
| 319 | 5K | 108 A | 45172.688 |
| 320 | 5K | 106 E | 45188.528 |
| 321 | 5K | 107 B | 45233.22  |
| 322 | 5K | 107 E | 45260.046 |
| 323 | 5K | 109 A | 45283.72  |
| 324 | 5K | 110 A | 45407.929 |
| 325 | 5K | 108 E | 45423.395 |
| 326 | 5K | 108 B | 45435.526 |

---



**Table 3S.** Cartesian coordinates (in Å) of the DFT optimized geometry of  $\{K_4[Eu(DOTP)]\}^-$  cluster representing  $I_{Eu1}$  and  $II_{Eu1}$  sites.

| Atom | $I_{Eu1}$ |          |          |
|------|-----------|----------|----------|
|      | x         | y        | z        |
| Eu   | -0.04178  | -0.02604 | -0.29251 |
| O    | -3.77901  | 2.71597  | -1.26817 |
| O    | -4.30950  | 0.48148  | 0.02434  |
| O    | -2.04955  | 0.83048  | -1.13638 |
| C    | -2.46064  | 2.30022  | 1.06153  |
| H    | -1.87376  | 3.14015  | 0.68010  |
| H    | -3.21233  | 2.71754  | 1.75441  |
| N    | -1.53696  | 1.39028  | 1.79018  |
| C    | -0.65810  | 2.18207  | 2.67574  |
| H    | -1.24623  | 2.96107  | 3.19467  |
| H    | -0.27343  | 1.52360  | 3.46025  |
| C    | 0.50371   | 2.86050  | 1.95222  |
| H    | 0.13989   | 3.52406  | 1.16288  |
| H    | 1.03778   | 3.50000  | 2.68072  |
| P    | -3.29550  | 1.54027  | -0.42055 |
| K    | -3.67882  | -1.34183 | -1.73820 |
| O    | 3.34395   | -2.98710 | -1.77790 |
| O    | 4.15718   | -0.57640 | -1.09075 |
| O    | 1.67309   | -1.06508 | -1.49935 |
| C    | 2.71476   | -2.14186 | 0.71773  |
| H    | 2.06597   | -3.02037 | 0.66573  |
| H    | 3.63941   | -2.45140 | 1.23588  |
| N    | 2.00763   | -1.09697 | 1.50530  |
| C    | 1.42920   | -1.70153 | 2.72328  |
| H    | 2.15742   | -2.39324 | 3.18510  |
| H    | 1.26145   | -0.90789 | 3.45745  |
| C    | 0.12929   | -2.46603 | 2.47979  |
| H    | 0.27581   | -3.26500 | 1.74773  |
| H    | -0.16542  | -2.95637 | 3.42722  |
| P    | 3.08601   | -1.67082 | -1.04618 |
| K    | 3.01684   | 0.92930  | -2.89665 |
| O    | -3.00715  | -3.68355 | -0.80882 |
| O    | -0.54882  | -4.30062 | -0.08714 |
| O    | -1.10693  | -1.97837 | -1.02101 |
| C    | -2.04810  | -2.49685 | 1.42957  |
| H    | -2.94081  | -1.88367 | 1.27965  |
| H    | -2.31233  | -3.28180 | 2.15985  |
| N    | -0.97855  | -1.62113 | 1.97845  |
| C    | -1.53140  | -0.78556 | 3.06460  |
| H    | -2.18402  | -1.39498 | 3.71632  |
| H    | -0.70476  | -0.44914 | 3.69744  |

|   |          |          |          |
|---|----------|----------|----------|
| C | -2.33299 | 0.41900  | 2.57468  |
| H | -3.16528 | 0.10370  | 1.93937  |
| H | -2.78000 | 0.91765  | 3.45584  |
| P | -1.66057 | -3.25585 | -0.22718 |
| K | 0.83967  | -3.58925 | -2.18352 |
| O | 2.57209  | 3.41243  | -2.23725 |
| O | 0.39651  | 4.20570  | -0.97927 |
| O | 0.73048  | 1.74377  | -1.61473 |
| C | 2.30221  | 2.65521  | 0.34968  |
| H | 3.13302  | 2.00345  | 0.06618  |
| H | 2.73942  | 3.54795  | 0.83044  |
| N | 1.44922  | 1.91444  | 1.31702  |
| C | 2.30251  | 1.26610  | 2.33441  |
| H | 3.09520  | 1.96281  | 2.66345  |
| H | 1.69277  | 1.06485  | 3.22026  |
| C | 2.96598  | -0.02453 | 1.85733  |
| H | 3.58098  | 0.15536  | 0.97124  |
| H | 3.65236  | -0.37401 | 2.65211  |
| P | 1.45108  | 3.12530  | -1.23955 |
| K | -1.50165 | 3.17672  | -2.45133 |

---

| Atom | x        | $\parallel_{Eu1}$ |          |
|------|----------|-------------------|----------|
|      |          | y                 | z        |
| Eu   | 0.00000  | -0.00018          | -0.00791 |
| O    | 2.72398  | -3.33932          | 0.22574  |
| O    | 1.79650  | -1.08565          | 1.02089  |
| O    | 4.31694  | -1.49237          | 1.22395  |
| C    | 3.26043  | -1.00695          | -1.21873 |
| H    | 4.02099  | -1.52303          | -1.83090 |
| H    | 3.65145  | -0.01054          | -0.99551 |
| N    | 2.00041  | -0.84220          | -1.99103 |
| C    | 2.19808  | 0.16152           | -3.05647 |
| H    | 3.17056  | -0.00232          | -3.55624 |
| H    | 1.43451  | 0.00472           | -3.82427 |
| C    | 2.14789  | 1.60831           | -2.56673 |
| H    | 2.40183  | 2.26878           | -3.41794 |
| H    | 2.90346  | 1.78823           | -1.79713 |
| K    | 3.50480  | 0.84296           | 2.02772  |
| P    | 3.06680  | -1.85961          | 0.42618  |
| O    | -2.72407 | 3.33904           | 0.22626  |
| O    | -1.79636 | 1.08528           | 1.02077  |
| O    | -4.31679 | 1.49182           | 1.22430  |
| C    | -3.26051 | 1.00690           | -1.21867 |
| H    | -4.02088 | 1.52324           | -1.83086 |
| H    | -3.65176 | 0.01054           | -0.99564 |
| N    | -2.00043 | 0.84201           | -1.99086 |
| C    | -2.19810 | -0.16169          | -3.05634 |

|   |          |          |          |
|---|----------|----------|----------|
| H | -3.17061 | 0.00214  | -3.55606 |
| H | -1.43458 | -0.00480 | -3.82417 |
| C | -2.14786 | -1.60851 | -2.56672 |
| H | -2.40188 | -2.26890 | -3.41797 |
| H | -2.90337 | -1.78849 | -1.79708 |
| K | -3.50463 | -0.84351 | 2.02759  |
| P | -3.06679 | 1.85928  | 0.42640  |
| O | 3.33926  | 2.72410  | 0.22626  |
| O | 1.08564  | 1.79607  | 1.02080  |
| O | 1.49181  | 4.31656  | 1.22433  |
| C | 1.00703  | 3.26033  | -1.21861 |
| H | 1.52329  | 4.02079  | -1.83074 |
| H | 0.01066  | 3.65151  | -0.99549 |
| N | 0.84217  | 2.00032  | -1.99090 |
| C | -0.16160 | 2.19806  | -3.05630 |
| H | 0.00220  | 3.17060  | -3.55598 |
| H | -0.00477 | 1.43459  | -3.82419 |
| C | -1.60837 | 2.14778  | -2.56657 |
| H | -2.26885 | 2.40181  | -3.41775 |
| H | -1.78830 | 2.90328  | -1.79690 |
| K | -0.84320 | 3.50388  | 2.02815  |
| P | 1.85945  | 3.06662  | 0.42643  |
| O | -3.33925 | -2.72434 | 0.22585  |
| O | -1.08556 | -1.79662 | 1.02063  |
| O | -1.49213 | -4.31705 | 1.22410  |
| C | -1.00700 | -3.26072 | -1.21884 |
| H | -1.52329 | -4.02112 | -1.83105 |
| H | -0.01064 | -3.65195 | -0.99576 |
| N | -0.84211 | -2.00064 | -1.99102 |
| C | 0.16163  | -2.19829 | -3.05646 |
| H | -0.00214 | -3.17081 | -3.55619 |
| H | 0.00475  | -1.43478 | -3.82430 |
| C | 1.60842  | -2.14799 | -2.56674 |
| H | 2.26890  | -2.40199 | -3.41793 |
| H | 1.78836  | -2.90348 | -1.79706 |
| K | 0.84313  | -3.50470 | 2.02755  |
| P | -1.85950 | -3.06704 | 0.42616  |

---
